# Supplementary material for: Synthetic hematocrit from virtual non-contrast images for myocardial extracellular volume evaluation with photon-counting detector CT
Source: PubMed Central journal article supplement (PMC11557661; doi:10.1007/s00330-024-10865-7), 2024-06-27
Supplement: 330_2024_10865_MOESM1_ESM.pdf [file 330_2024_10865_MOESM1_ESM.pdf]

**Synthetic hematocrit from virtual non-contrast images for myocardial  
extracellular volume evaluation with photon-counting detector CT**

**Electronic Supplementary Material**

**Supplemental Figure 1:** Flowchart delineating the various reconstructed images and their corresponding tasks in the derivation and the validation cohort.

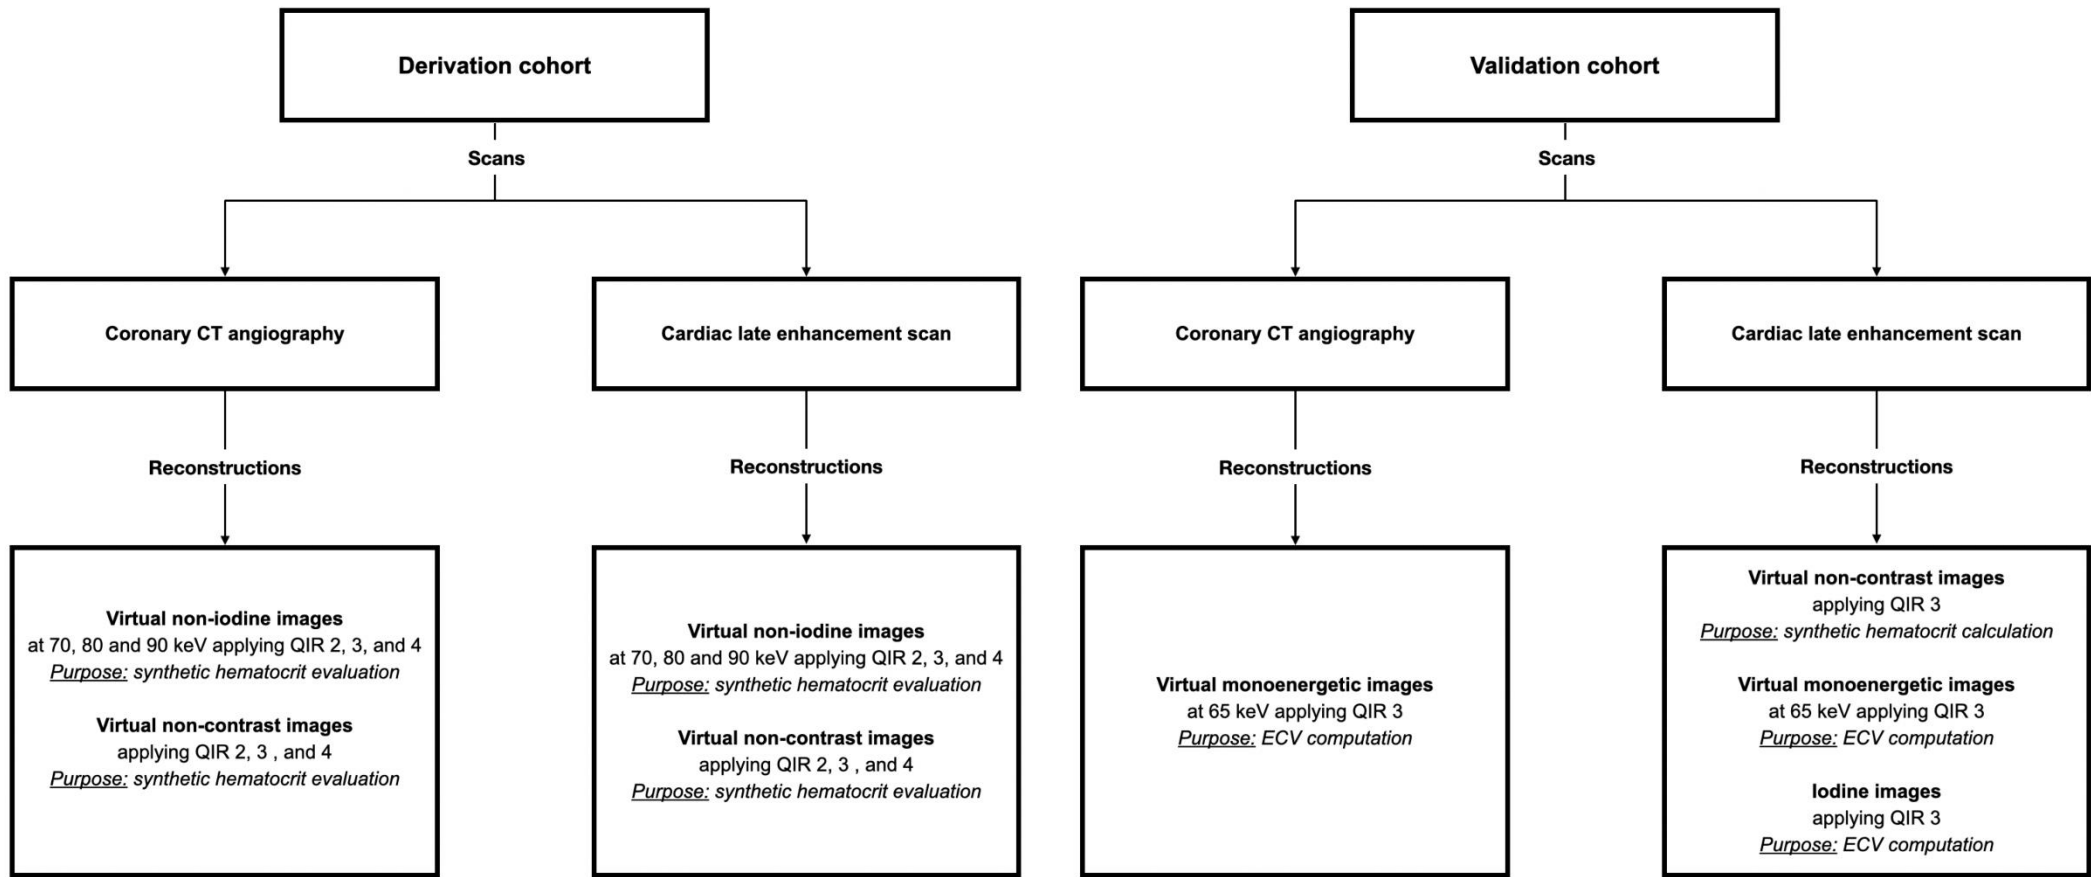

ECV = extracellular volume, QIR = quantum iterative reconstruction
